# Supplementary figures and images for: Inflammatory Microenvironment in Early Non-Small Cell Lung Cancer: Exploring the Predictive Value of Radiomics
Source: MDPI journal article supplement (doi:10.3390/cancers14143335), 2022-07-08

Supplementary

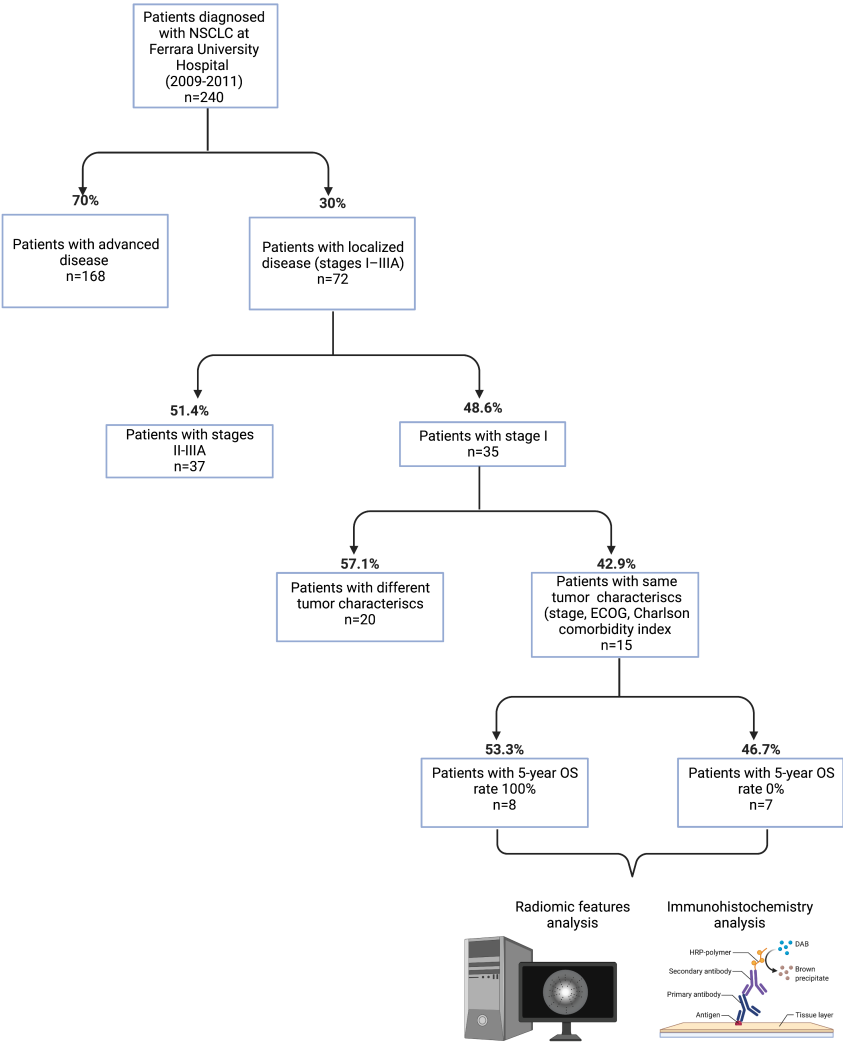

Supplement: s1 [file s1]
